# Supplementary figures and images for: Identification and characterization of binders to a novel cryptic and functional pocket in KRAS
Source: Research Square preprint supplement (doi:10.21203/rs.3.rs-5354688/v1), 2024-11-08

A

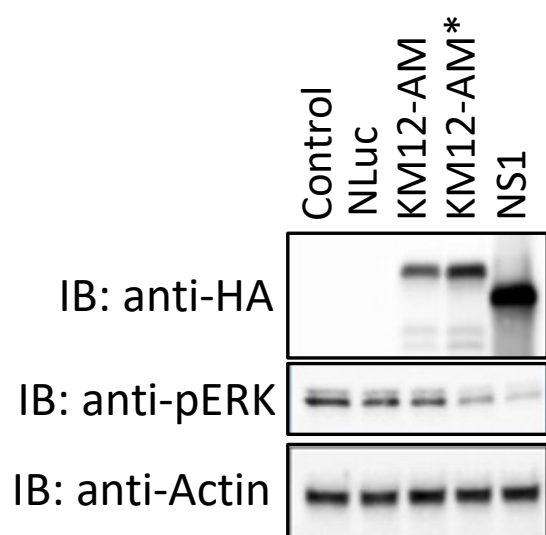

B

PATU8988T cells

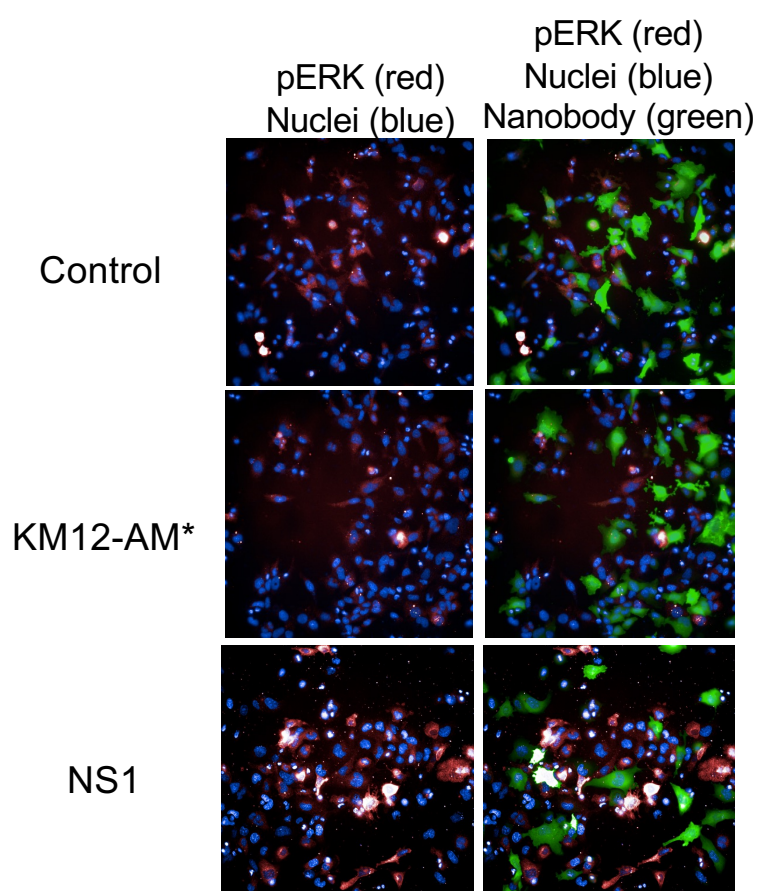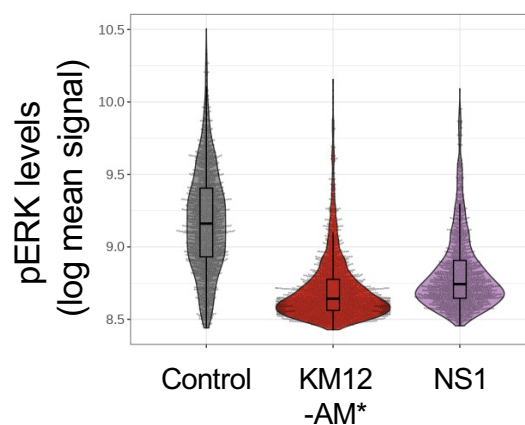

Supplement: Supplementary file 1 [file 4266434dce5822033b6511ed.pdf]

A

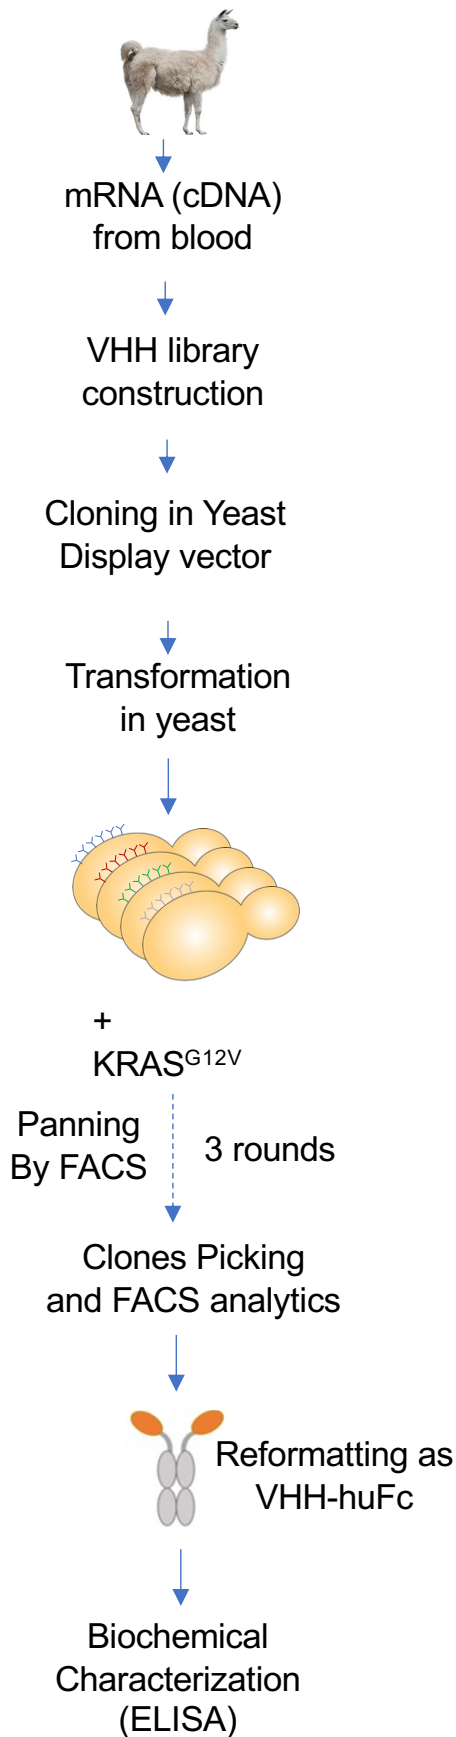

B

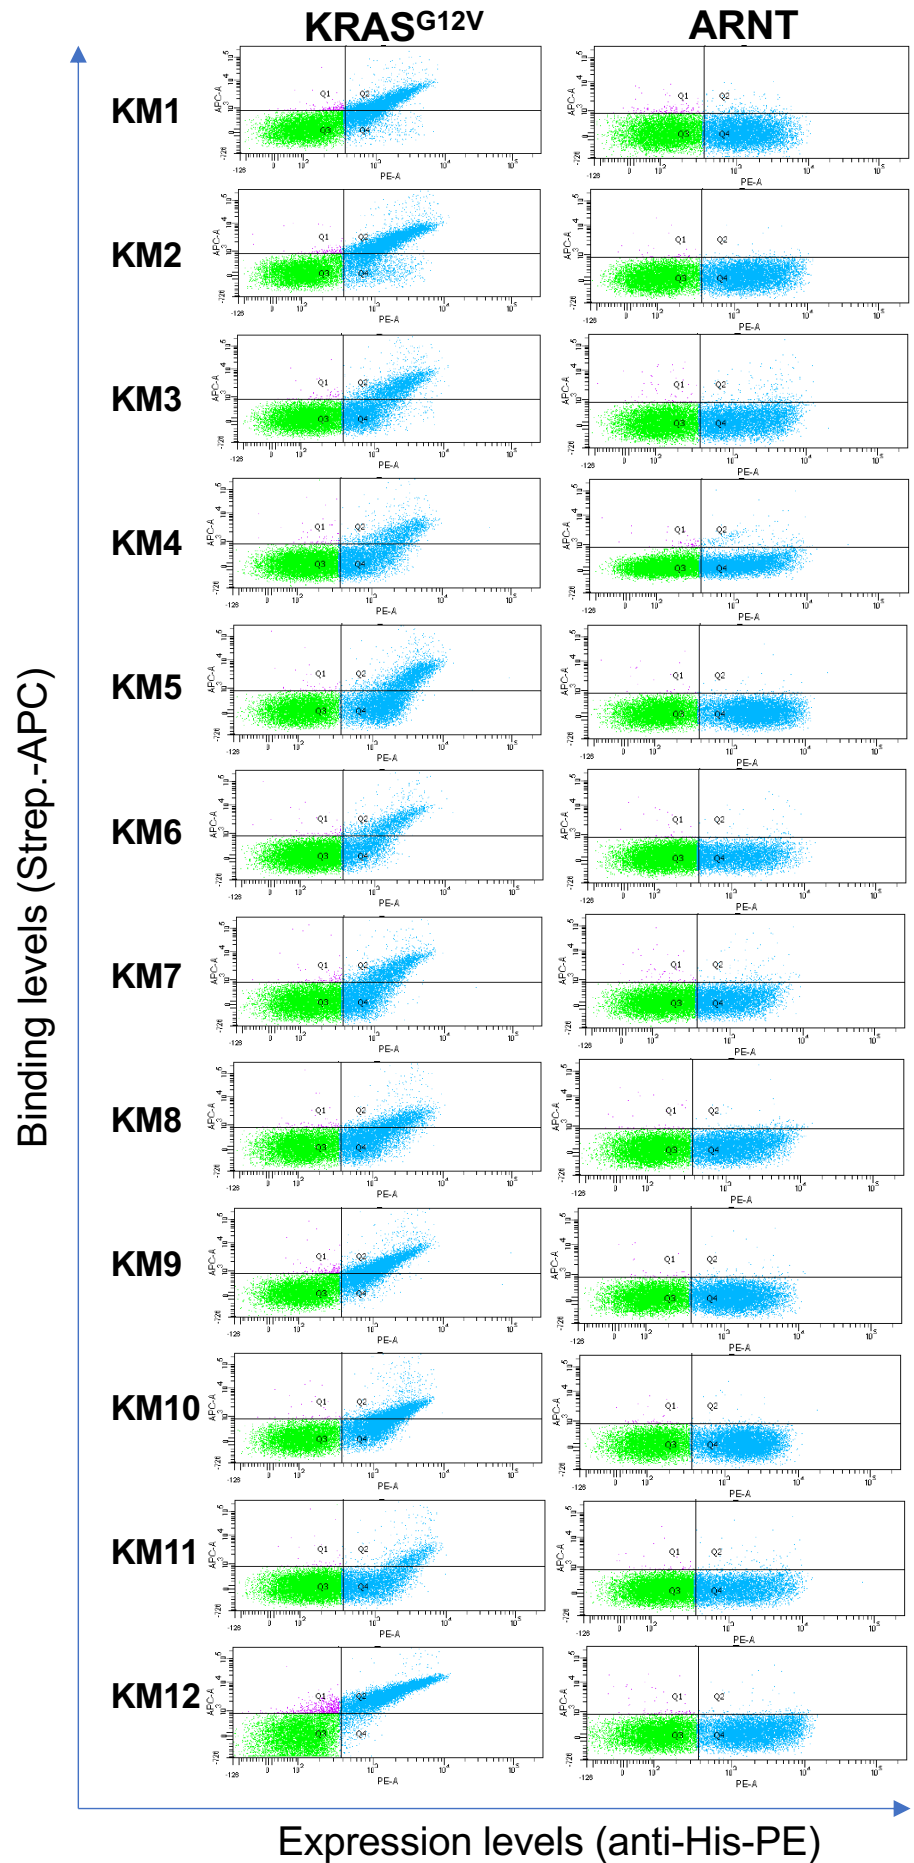

Supplementary Figure 2

Supplement: Supplementary file 2 [file 4bc229e5eeedead90d2bf6a6.pdf]
